# Supplementary material for: The use of the Patient Assessment of Chronic Illness Care (PACIC) instrument in diabetes care: a systematic review and meta-analysis
Source: Oxford University Press journal article supplement (doi:10.1093/intqhc/mzy091), 2018-04-13
Supplement: mzy091_pacicuseindiabetes_sr_suppl1searchstrategy.docx [file mzy091_pacicuseindiabetes_sr_suppl1searchstrategy.docx]

**Supplementary material 1. Search Strategy**

**Ovid MEDLINE (ran Oct 17, 2016)**

1 exp Diabetes Mellitus/ (360749)

2 diabet*.mp. (555993)

3 1 or 2 (557604)

4 PACIC*.mp. (101)

5 “Patient Assessment of Chronic Illness Care”.mp. (91)

6 4 or 5 (121)

7 3 and 6 (48)

**Ovid Embase (ran Oct 13, 2016)**

1 exp diabetes mellitus/ (786658)

2 diabet*.tw. (707089)

3 1 or 2 (871856)

4 PACIC.tw (129)

5 Patient Assessment of Chronic Illness Care.tw (102)

6 4 or 5 (154)

7 3 and 6 (67)

**Ovid PsycINFO (ran Oct 13, 2016)**

1 exp diabetes mellitus/ (6780)

2 diabet*.tw. (25097)

3 1 or 2 (25528)

4 PACIC.tw (28)

5 Patient Assessment of Chronic Illness Care.tw (30)

6 4 or 5 (35)

7 3 and 6 (16)

**CINAHL (ran Oct 13, 2016)**

(MH “diabetes mellitus” OR TX diabet*) AND (TX PACIC OR Patient Assessment of Chronic Illness Care) (23)

**PMC (PubMed Central) (ran Oct 17, 2016)**

(diabetes* or diabetic* or diabetol*) AND (pacic OR "patient assessment of chronic illness care") (265)
