# Supplementary material for: The use of the Patient Assessment of Chronic Illness Care (PACIC) instrument in diabetes care: a systematic review and meta-analysis
Source: Oxford University Press journal article supplement (doi:10.1093/intqhc/mzy091), 2018-04-13
Supplement: mzy091_pacicuseindiabetes_sr_suppl4characteristicsofongoingstudies.docx [file mzy091_pacicuseindiabetes_sr_suppl4characteristicsofongoingstudies.docx]

**Supplementary table 4. Characteristics of ongoing studies or studies without published results using the PACIC instrument among patients with diabetes.**

| **Author (publication year)** | **Study and healthcare delivery characteristics** | **Patient characteristics** | | **PACIC instrument** |
| --- | --- | --- | --- | --- |
|  | **N patients planned** | **Type of diabetes** | **Language, nb of items** |
| **Yu & al (2015) [1]** | *Study design*: Cluster-RCT  *Country*: Canada  *Setting*: family practice groups (health integration networks)  *HC professionals*: physicians, nurses, dietitians and/or pharmacists  *Type of care*: usual care (at baseline) | 112 (2x56) | Type 2 | Not reported |
| **Bozorgmehr & al (2014) [2]** | *Study design*: RCT  *Country*: Germany  *Setting*: primary care practice  *HC professionals*: GPs  *Type of care*: usual care (at baseline) | 582 | Type 2 | not reported  11 items |
| **Drewelow & al (2012) [3]** | *Study design*: cluster-RCT  *Country*: Germany  *Setting:* primary care practice  *HC professionals:* GPs  *Type of care:* usual care (at baseline) | 780 | Type 2 | PACIC-D  Not clear |
| **Freund & al (2011) [4, 5]** | *Study design*: cluster-RCT  *Country*: Germany  *Setting*: primary care practice (n=130)  *HC professionals*: GP or general internist, healthcare assistants  *Type of care*: usual care (at baseline) | 2210 | Type 2 | Not clear |
| **Versnel & al (2011) [6]** | *Study design*: RCT  *Country*: Netherlands  *Setting*: primary care practice  *HC professionals*: GP, practice nurse, diabetes nurse, dietician  *Type of care*: integrated care (at baseline) | 230 | Type 2 | not reported  20 items |

RCT: randomized controlled trial, GP: general practitioner, HC: healthcare, nb: number

References

[1] Yu CH, Ivers NM, Stacey D, Rezmovitz J, Telner D, Thorpe K, et al. Impact of an interprofessional shared decision-making and goal-setting decision aid for patients with diabetes on decisional conflict – study protocol for a randomized controlled trial. *Trials*. 2015; 16.

[2] Bozorgmehr K, Szecsenyi J, Ose D, Besier W, Mayer M, Krisam J, et al. Practice network-based care management for patients with type 2 diabetes and multiple comorbidities (GEDIMAplus): study protocol for a randomized controlled trial. *Trials*. 2014; 15: 243.

[3] Drewelow E, Wollny A, Pentzek M, Immecke J, Lambrecht S, Wilm S, et al. Improvement of primary health care of patients with poorly regulated diabetes mellitus type 2 using shared decision-making – the DEBATE trial. *BMC Family Practice*. 2012; 13: 88.

[4] Freund T, Peters-Klimm F, Boyd CM, Mahler C, Gensichen J, Erler A, et al. Medical Assistant-Based Care Management for High-Risk Patients in Small Primary Care Practices: A Cluster Randomized Clinical Trial. *Ann Intern Med*. 2016; 164: 323-30.

[5] Freund T, Peters-Klimm F, Rochon J, Mahler C, Gensichen J, Erler A, et al. Primary care practice-based care management for chronically ill patients (PraCMan): study protocol for a cluster randomized controlled trial [ISRCTN56104508]. *Trials*. 2011; 12: 163.

[6] Versnel N, Welschen LM, Baan CA, Nijpels G, Schellevis FG. The effectiveness of case management for comorbid diabetes type 2 patients; the CasCo study. Design of a randomized controlled trial. *BMC Family Practice*. 2011; 12: 68.
